# Supplementary material for: Improvement of Workplace Environment That Affects Motivation of Japanese Dental Hygienists
Source: MDPI journal article supplement (doi:10.3390/ijerph18031309), 2021-02-01
Supplement: s1 [file s1]

## Supplemental materials

### Improvement of workplace environment that affects motivation of Japanese dental hygienists

**Table S1.** Frequency table of fourteen items that Japanese dental hygienists wish to improve

|                                                           |           | N    | %    |                                                              |           | n    | %    |
|-----------------------------------------------------------|-----------|------|------|--------------------------------------------------------------|-----------|------|------|
| Improvement in working conditions including higher salary | Yes       | 1955 | 51.4 | Opportunities for upgrading skills                           | Yes       | 906  | 23.8 |
|                                                           | No        | 1779 | 46.7 |                                                              | No        | 2828 | 74.3 |
|                                                           | No answer | 73   | 1.9  |                                                              | No answer | 73   | 1.9  |
| Reduction of work volume                                  | Yes       | 755  | 19.8 | Implementation of various working patterns and working hours | Yes       | 394  | 10.3 |
|                                                           | No        | 2979 | 78.3 |                                                              | No        | 3340 | 87.7 |
|                                                           | No answer | 73   | 1.9  |                                                              | No answer | 73   | 1.9  |
| Improvement in interpersonal relations in the workplace   | Yes       | 682  | 17.9 | Strengthening workplace safety                               | Yes       | 729  | 19.1 |
|                                                           | No        | 3052 | 80.2 |                                                              | No        | 3005 | 78.9 |
|                                                           | No answer | 73   | 1.9  |                                                              | No answer | 73   | 1.9  |
| Reduction of working hours                                | Yes       | 768  | 20.2 | Ensuring employment stability                                | Yes       | 406  | 10.7 |
|                                                           | No        | 2966 | 77.9 |                                                              | No        | 3328 | 87.4 |
|                                                           | No answer | 73   | 1.9  |                                                              | No answer | 73   | 1.9  |
| Increased number of holidays                              | Yes       | 1157 | 30.4 | Expanding welfare benefits                                   | Yes       | 1067 | 28.0 |
|                                                           | No        | 2577 | 67.7 |                                                              | No        | 2667 | 70.1 |
|                                                           | No answer | 73   | 1.9  |                                                              | No answer | 73   | 1.9  |

**Table S2.** Cross tabulations of job satisfaction against age or career as dental hygienists.

|                                                        |                   | Age group                   |       |       |       |       |      |        | p-value |
|--------------------------------------------------------|-------------------|-----------------------------|-------|-------|-------|-------|------|--------|---------|
|                                                        |                   | 30<                         | 30-39 | 40-49 | 50-59 | 60-69 | 70-  |        |         |
| Do you wish to continue working as a dental hygienist? | Yes               | 1041                        | 1248  | 2332  | 1961  | 389   | 13   | <0.001 |         |
|                                                        | No                | 84                          | 67    | 109   | 123   | 64    | 8    |        |         |
| Do you feel that dental hygienist work is rewarding?   | Strongly agree    | 216                         | 264   | 529   | 459   | 109   | 9    | <0.001 |         |
|                                                        | Agree             | 751                         | 886   | 1660  | 1457  | 315   | 11   |        |         |
|                                                        | Disagree          | 143                         | 147   | 223   | 140   | 25    | 2    |        |         |
|                                                        | Strongly disagree | 15                          | 16    | 20    | 9     | 1     | 0    |        |         |
|                                                        |                   | Career as dental hygienists |       |       |       |       |      |        | p-value |
|                                                        |                   | 0-5                         | 6-10  | 11-20 | 21-30 | 31-40 | 41-  |        |         |
| Do you wish to continue working as a dental hygienist? | Yes               | 1026                        | 729   | 1024  | 807   | 14    | 3007 | <0.001 |         |
|                                                        | No                | 51                          | 30    | 69    | 66    | 9     | 209  |        |         |
| Do you feel that dental hygienist work is rewarding?   | Strongly agree    | 215                         | 147   | 249   | 159   | 11    | 717  | <0.001 |         |
|                                                        | Agree             | 750                         | 531   | 712   | 577   | 11    | 2223 |        |         |
|                                                        | Disagree          | 96                          | 69    | 119   | 122   | 2     | 238  |        |         |
|                                                        | Strongly disagree | 8                           | 9     | 13    | 13    | 0     | 15   |        |         |

P-values were calculated by chi-square tests.

**Table S3.** Results of Item response theory analysis by two parameter logistic model

|                                                              | Item discrimination ( $a_i$ ) |       | Item difficulty ( $b_i$ ) |       |
|--------------------------------------------------------------|-------------------------------|-------|---------------------------|-------|
|                                                              | Estimate                      | SE    | Estimate                  | SE    |
| Improvement in working conditions including higher salary    | 1.140                         | 0.080 | -0.105                    | 0.037 |
| Reduction of work volume                                     | 0.712                         | 0.070 | 2.123                     | 0.185 |
| Improvement in interpersonal relations in the workplace      | 0.422                         | 0.060 | 3.682                     | 0.496 |
| Reduction of working hours                                   | 0.882                         | 0.081 | 1.763                     | 0.134 |
| Increased number of holidays                                 | 0.956                         | 0.075 | 0.992                     | 0.071 |
| Expanding childcare support                                  | 0.823                         | 0.078 | 2.676                     | 0.214 |
| Evaluation of expertise / qualifications                     | 0.929                         | 0.078 | 1.651                     | 0.115 |
| Opportunities for upgrading skills                           | 0.501                         | 0.062 | 2.393                     | 0.279 |
| Implementation of various working patterns and working hours | 1.057                         | 0.092 | 2.399                     | 0.161 |
| Strengthening workplace safety                               | 0.808                         | 0.074 | 1.977                     | 0.154 |
| Ensuring employment stability                                | 0.842                         | 0.082 | 2.807                     | 0.230 |
| Expanding welfare benefits                                   | 0.927                         | 0.072 | 1.159                     | 0.081 |

**Table S4.** Cross tabulations of motivation of Japanese dental hygienists and improvement in working conditions

|                                                              |     | Do you wish to continue working as a dental hygienist? |     | P-value |
|--------------------------------------------------------------|-----|--------------------------------------------------------|-----|---------|
|                                                              |     | Yes                                                    | No  |         |
| Improvement in working conditions including higher salary    | No  | 1680                                                   | 94  | 0.171   |
|                                                              | Yes | 1828                                                   | 124 |         |
| Reduction of work volume                                     | No  | 2819                                                   | 154 | 0.001   |
|                                                              | Yes | 689                                                    | 64  |         |
| Improvement in interpersonal relations in the workplace      | No  | 2887                                                   | 159 | 0.001   |
|                                                              | Yes | 621                                                    | 59  |         |
| Reduction of working hours                                   | No  | 2819                                                   | 140 | <0.001  |
|                                                              | Yes | 689                                                    | 78  |         |
| Increased number of holidays                                 | No  | 2443                                                   | 129 | 0.001   |
|                                                              | Yes | 1065                                                   | 89  |         |
| Expanding childcare support                                  | No  | 3081                                                   | 186 | 0.275   |
|                                                              | Yes | 427                                                    | 32  |         |
| Evaluation of expertise / qualifications                     | No  | 2755                                                   | 184 | 0.039   |
|                                                              | Yes | 753                                                    | 34  |         |
| Opportunities for upgrading skills                           | No  | 2634                                                   | 187 | <0.001  |
|                                                              | Yes | 874                                                    | 31  |         |
| Implementation of various working patterns and working hours | No  | 3138                                                   | 194 | 0.830   |
|                                                              | Yes | 370                                                    | 24  |         |
| Strengthening workplace safety                               | No  | 2817                                                   | 182 | 0.250   |
|                                                              | Yes | 691                                                    | 36  |         |
| Ensuring employment stability                                | No  | 3128                                                   | 194 | 0.935   |
|                                                              | Yes | 380                                                    | 24  |         |
| Expanding welfare benefits                                   | No  | 2514                                                   | 148 | 0.231   |
|                                                              | Yes | 994                                                    | 70  |         |

P-values were calculated by chi-square tests.

**Table S5.** Results of factor analysis for the fourteen items that Japanese dental hygienists wish to improve

|                                                              | Factor |        |        |        |
|--------------------------------------------------------------|--------|--------|--------|--------|
|                                                              | 1      | 2      | 3      | 4      |
| Expanding welfare benefits                                   | 0.987  | -0.010 | -0.007 | 0      |
| Reduction of working hours                                   | 0.062  | 0.541  | -0.258 | -0.100 |
| Reduction of work volume                                     | 0.017  | 0.434  | -0.155 | -0.170 |
| Increased number of holidays                                 | 0.147  | 0.393  | -0.082 | 0.081  |
| Implementation of various working patterns and working hours | 0.087  | 0.335  | 0.018  | 0.119  |
| Improvement in working conditions including higher salary    | 0.193  | 0.313  | 0.123  | -0.049 |
| Improvement in interpersonal relations in the workplace      | 0.033  | 0.157  | 0.082  | 0.030  |
| Evaluation of expertise / qualifications                     | 0.130  | 0.229  | 0.454  | -0.102 |
| Opportunities for upgrading skills                           | 0.158  | 0.034  | 0.405  | -0.042 |
| Strengthening workplace safety                               | 0.191  | 0.143  | 0.343  | -0.090 |
| Ensuring employment stability                                | 0.174  | 0.131  | 0.185  | 0.056  |
| Expanding childcare support                                  | 0.077  | 0.288  | 0.087  | 0.399  |
| Total                                                        | 0.96   | 0.881  | 0.803  | 0.428  |
| Variance %                                                   | 7.996  | 7.345  | 6.913  | 3.569  |
| Cumulative variance %                                        | 7.996  | 15.341 | 22.254 | 25.823 |

Factor analysis by maximum likelihood method with Varimax rotation was carried out for 12 items that concern with the volition of dental hygienists.

**Table S6.** Cross tabulation of improvement in working conditions against financial reward

|                                                              |     | Do you feel the work of dental hygienist is rewarding? |       |          |                   | P-value |
|--------------------------------------------------------------|-----|--------------------------------------------------------|-------|----------|-------------------|---------|
|                                                              |     | Strongly agree                                         | Agree | Disagree | Strongly disagree |         |
| Improvement in working conditions including higher salary    | No  | 415                                                    | 1187  | 155      | 11                | <0.001  |
|                                                              | Yes | 257                                                    | 1380  | 277      | 31                |         |
| Reduction of work volume                                     | No  | 560                                                    | 2053  | 320      | 30                | 0.001   |
|                                                              | Yes | 112                                                    | 514   | 112      | 12                |         |
| Improvement in interpersonal relations in the workplace      | No  | 611                                                    | 2116  | 283      | 27                | <0.001  |
|                                                              | Yes | 61                                                     | 451   | 149      | 15                |         |
| Reduction of working hours                                   | No  | 556                                                    | 2063  | 304      | 27                | <0.001  |
|                                                              | Yes | 116                                                    | 504   | 128      | 15                |         |
| Increased number of holidays                                 | No  | 506                                                    | 1779  | 260      | 19                | <0.001  |
|                                                              | Yes | 166                                                    | 788   | 172      | 23                |         |
| Expanding childcare support                                  | No  | 603                                                    | 2257  | 364      | 32                | 0.006   |
|                                                              | Yes | 69                                                     | 310   | 68       | 10                |         |
| Evaluation of expertise / qualifications                     | No  | 578                                                    | 2021  | 301      | 26                | <0.001  |
|                                                              | Yes | 94                                                     | 546   | 131      | 16                |         |
| Opportunities for upgrading skills                           | No  | 549                                                    | 1916  | 319      | 27                | <0.001  |
|                                                              | Yes | 123                                                    | 651   | 113      | 15                |         |
| Implementation of various working patterns and working hours | No  | 617                                                    | 2303  | 369      | 33                | 0.001   |
|                                                              | Yes | 55                                                     | 264   | 63       | 9                 |         |
| Strengthening workplace safety                               | No  | 575                                                    | 2080  | 304      | 30                | <0.001  |
|                                                              | Yes | 97                                                     | 487   | 128      | 12                |         |
| Ensuring employment stability                                | No  | 622                                                    | 2291  | 363      | 33                | <0.001  |
|                                                              | Yes | 50                                                     | 276   | 69       | 9                 |         |
| Expanding welfare benefits                                   | No  | 502                                                    | 1843  | 282      | 24                | 0.001   |
|                                                              | Yes | 170                                                    | 724   | 150      | 18                |         |

P-values were calculated by chi-square tests.
